# Supplementary material for: A novel numerical method coupling CFD with PSO vs. a mathematical approach in the modeling of photocatalytic degradation of NO
Source: Royal Society of Chemistry journal article supplement (doi:10.1039/d3re00127j), 2023-01-01
Supplement: d3re00127j1.pdf [file d3re00127j1.pdf]

## Supporting Information

### **A novel numerical method coupling CFD with PSO vs. mathematical approach in the modeling of photocatalytic degradation of NO**

Guoqing Zhang<sup>a,b</sup>, Jiayou Liu<sup>a,b</sup>, Liuhu Jia<sup>a,b</sup>, Haiming Wang<sup>c</sup>, Zhongchao Tan<sup>c,d\*</sup>, Hesheng Yu<sup>a,b\*</sup>

a. Key Laboratory of Coal Processing and Efficient Utilization, Ministry of Education, Xuzhou, Jiangsu, China 221116

b. School of Chemical Engineering and Technology, China University of Mining and Technology, Xuzhou, Jiangsu, China 221116

c. Department of Energy and Power Engineering, Tsinghua University, Beijing, China 100084

d. Department of Mechanical & Mechatronics Engineering, University of Waterloo, 200 University Avenue West, Waterloo, Ontario, Canada N2L 3G1

\* Corresponding Authors:

Dr. Z. Tan, Department of Mechanical & Mechatronics Engineering, University of Waterloo. E-mail: [tanz@uwaterloo.ca](mailto:tanz@uwaterloo.ca);

Dr. H. Yu, School of Chemical Engineering and Technology, China University of Mining and Technology. E-mail: [heshengyu@cumt.edu.cn](mailto:heshengyu@cumt.edu.cn).

The interaction tool in COMSOL Multiphysics, LiveLink™ for MATLAB®, allows for the creation of bidirectional integration between COMSOL Multiphysics and MATLAB platforms. The prerequisite for live link is that the COMSOL model can run independently. For the current study, the specific numerical procedures of how CFD computation in COMSOL is live-linked to PSO algorithm in MATLAB are described as follows:

Step 1: Initiate particle swarm. The particle swarm size ( $N = 20$ ), the dimension of the solution space ( $d = 2$ ), and the maximum iteration number ( $n_{\max} = 50$ ) are determined.

Step 2: Evaluate the individual fitness function. Enter commands in MATLAB Workspace to set CFD model parameters ( $k$  and  $K$ ), run the CFD model, and extract calculation results. Subsequently, the fitness function value of every particle is calculated according to the extracted model prediction results and experimental results.

Step 3: Update individual extreme value and global extreme value.

Step 4: Check termination condition. Output the optimal results when the maximum iteration is reached. Otherwise, loop to Step 2 and conduct the next iteration calculation.

Step 5: Update the locations and velocities of particles.

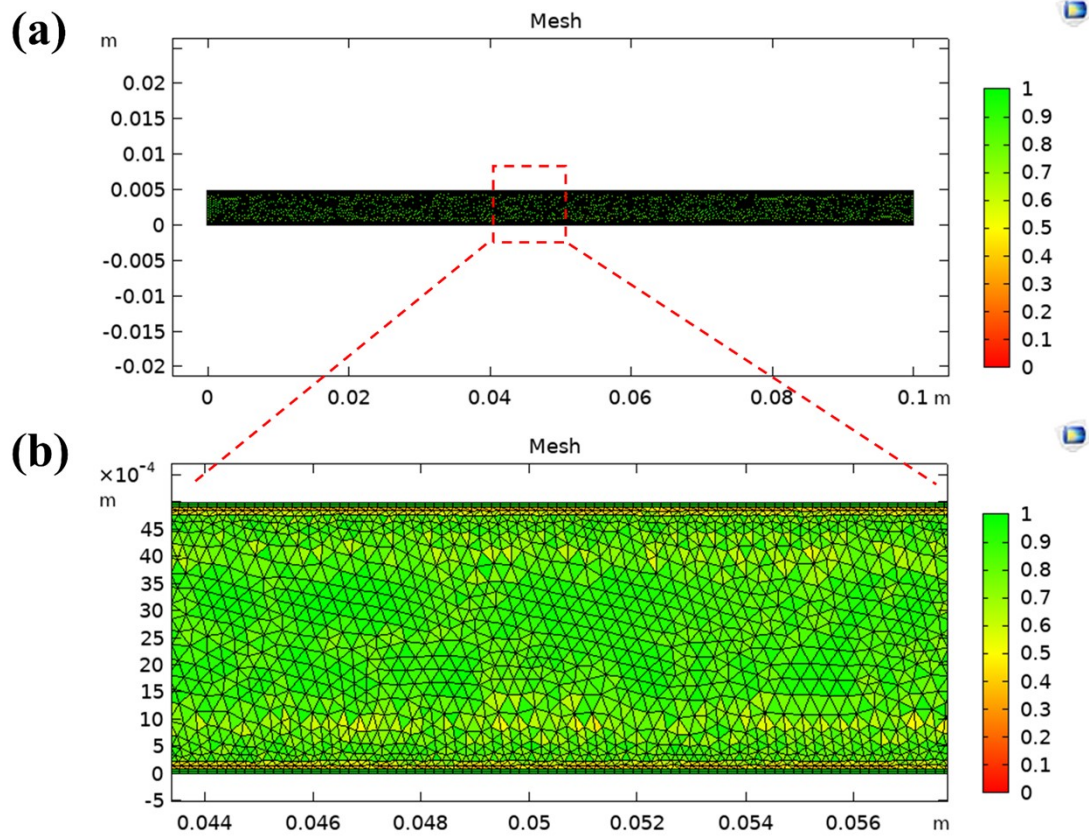

**Fig.S1** Meshes for the 2D geometry (with the distribution of mesh element quality).

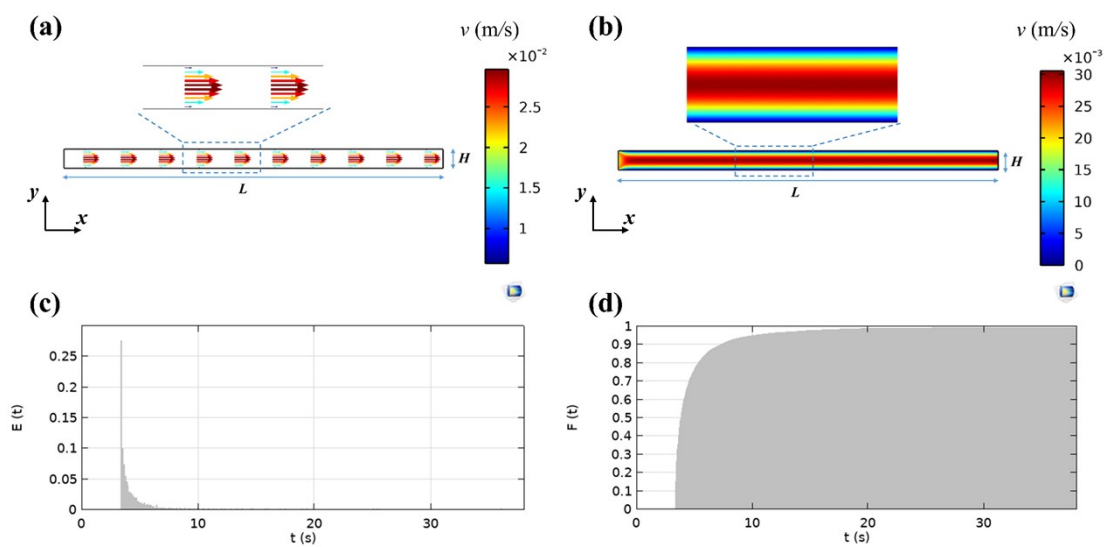

**Fig.S2** The simulation results of velocity field and residence time at the flow rate of  $300 \text{ mL} \cdot \text{min}^{-1}$ . (a) Velocity vector in the reactor, (b) velocity contour in the reactor, (c) residence time distribution, and (d) cumulative distribution function.
